# Supplementary material
Source: publisher figshare collection journal article supplement (https://diabetesjournals.figshare.com/ndownloader/files/22523171)
Supplement: Supplementary file 1 [file 22523171]

**Supplemental Table 1: Five Treatment Groups of IL-2 and/or Rapamycin**

| **Treatment** | **Group** | **IL-2** | **Dose** | **Rapamycin** | **Dose** |
| --- | --- | --- | --- | --- | --- |
| ID | Week | 7.5 IU/g | 24.9 IU/g | 1 mg/kg | 0.5 mg/kg |
|  | 1 | Yes |  |  |  |
| IL-2(0.3IU/m2) | 2 | Yes |  |  |  |
|  | 3 | Yes |  |  |  |
|  | 1 |  | Yes |  |  |
| IL-2(1IU/m2) | 2 |  | Yes |  |  |
|  | 3 |  | Yes |  |  |
|  | 1 | Yes |  | Yes |  |
| IL-2(0.3IU/m2)/ | 2 | Yes |  |  | Yes |
| Rapamycin | 3 | Yes |  |  | Yes |
|  | 1 |  | Yes | Yes |  |
| IL-2(1IU/m2)/ | 2 |  | Yes |  | Yes |
| Rapamycin | 3 |  | Yes |  | Yes |
|  | 1 |  |  | Yes |  |
| Rapamycin | 2 |  |  |  | Yes |
|  | 3 |  |  |  | Yes |
